# Supplementary material for: The precise timeline of transcriptional regulation reveals causation in mouse somitogenesis network
Source: PubMed Central journal article supplement (PMC4235037; doi:10.1186/1471-213x-13-42), 2013-12-05

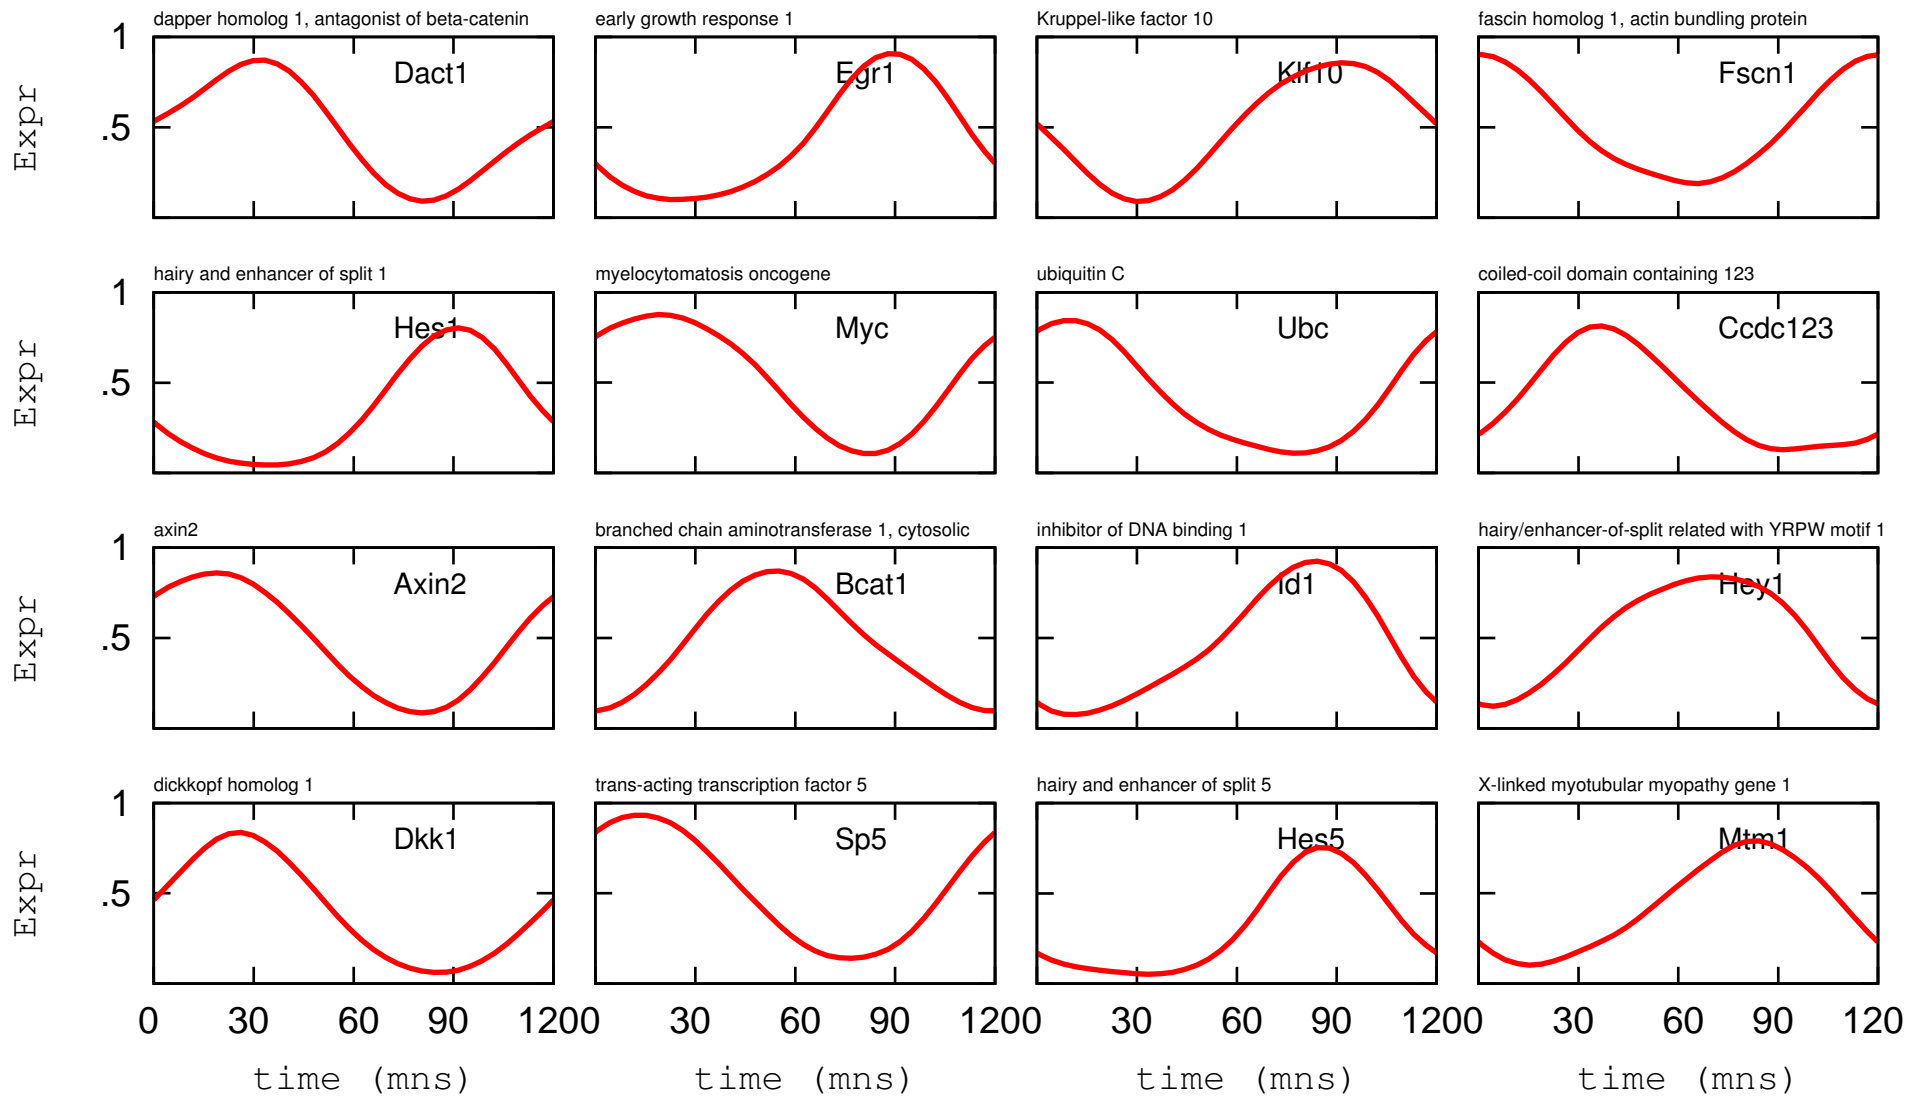

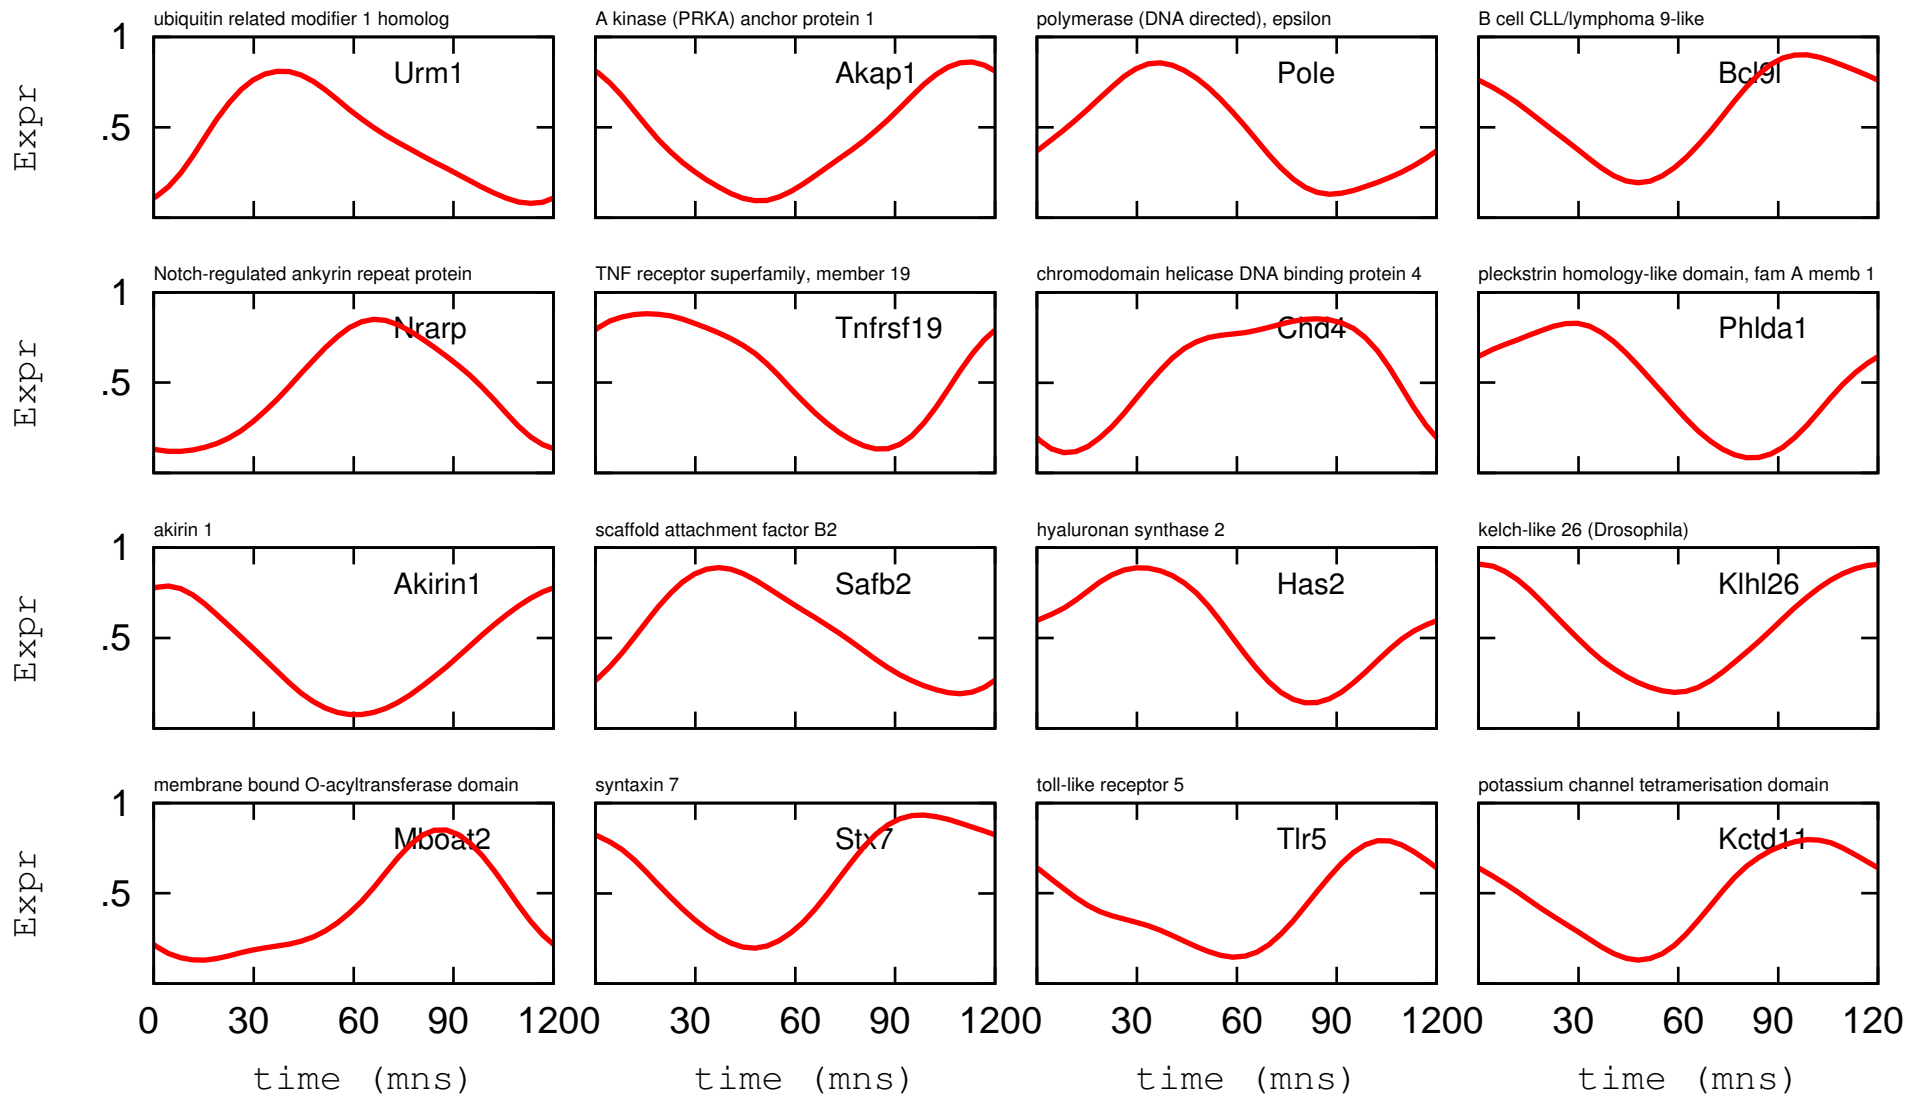

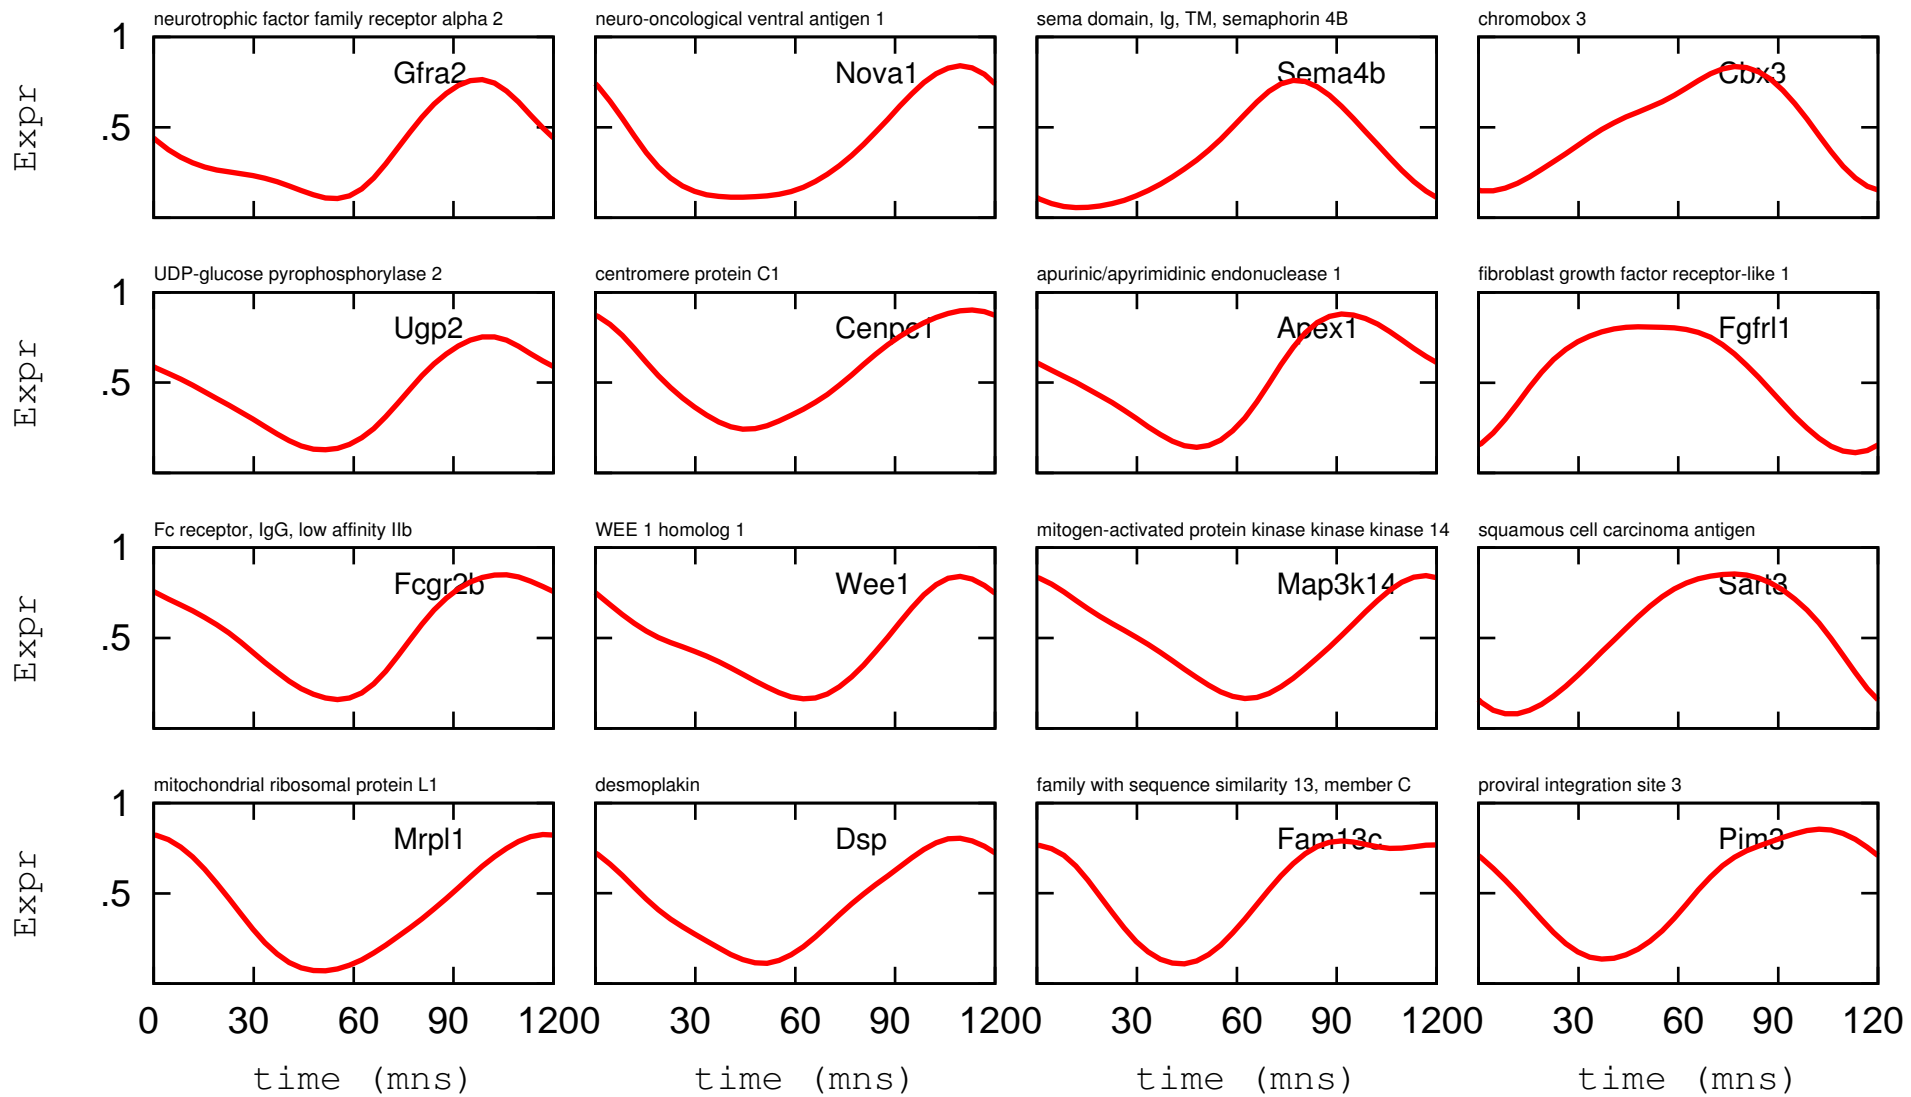

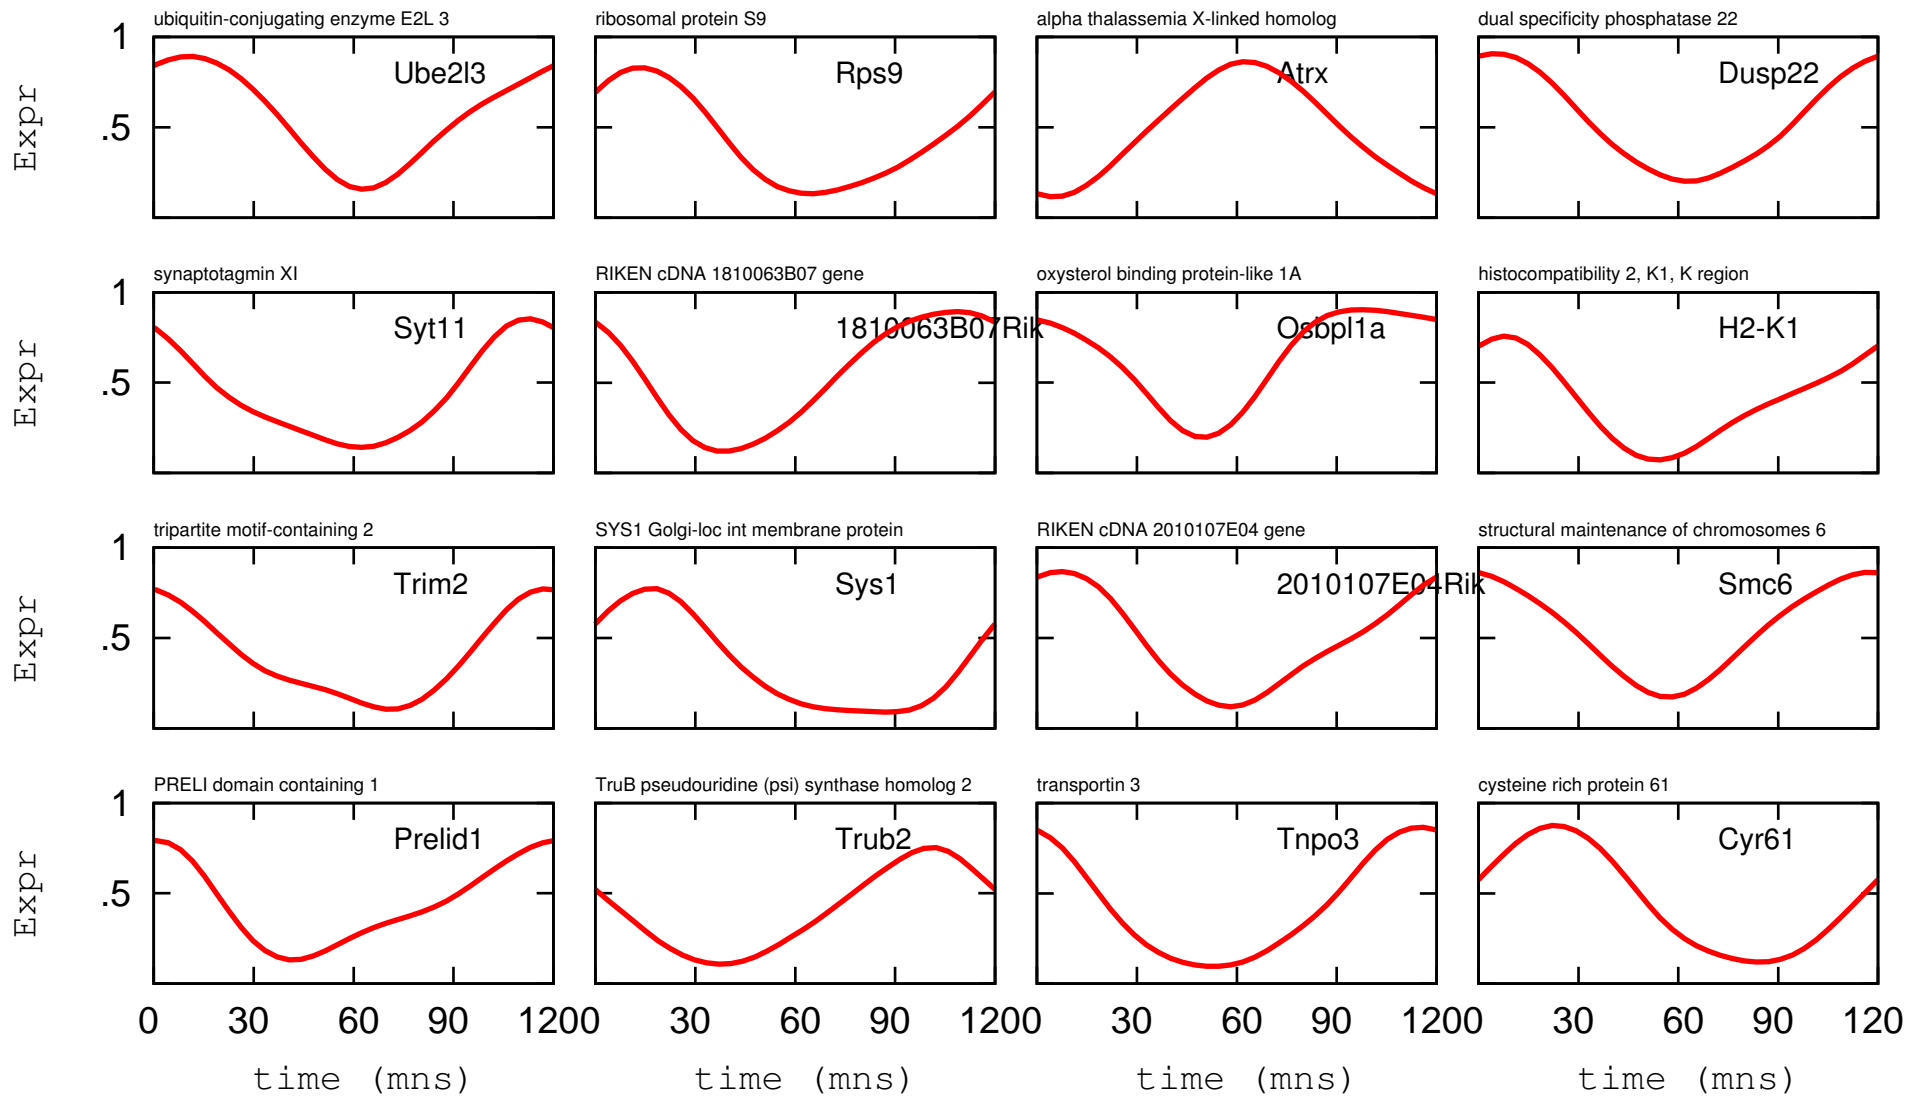

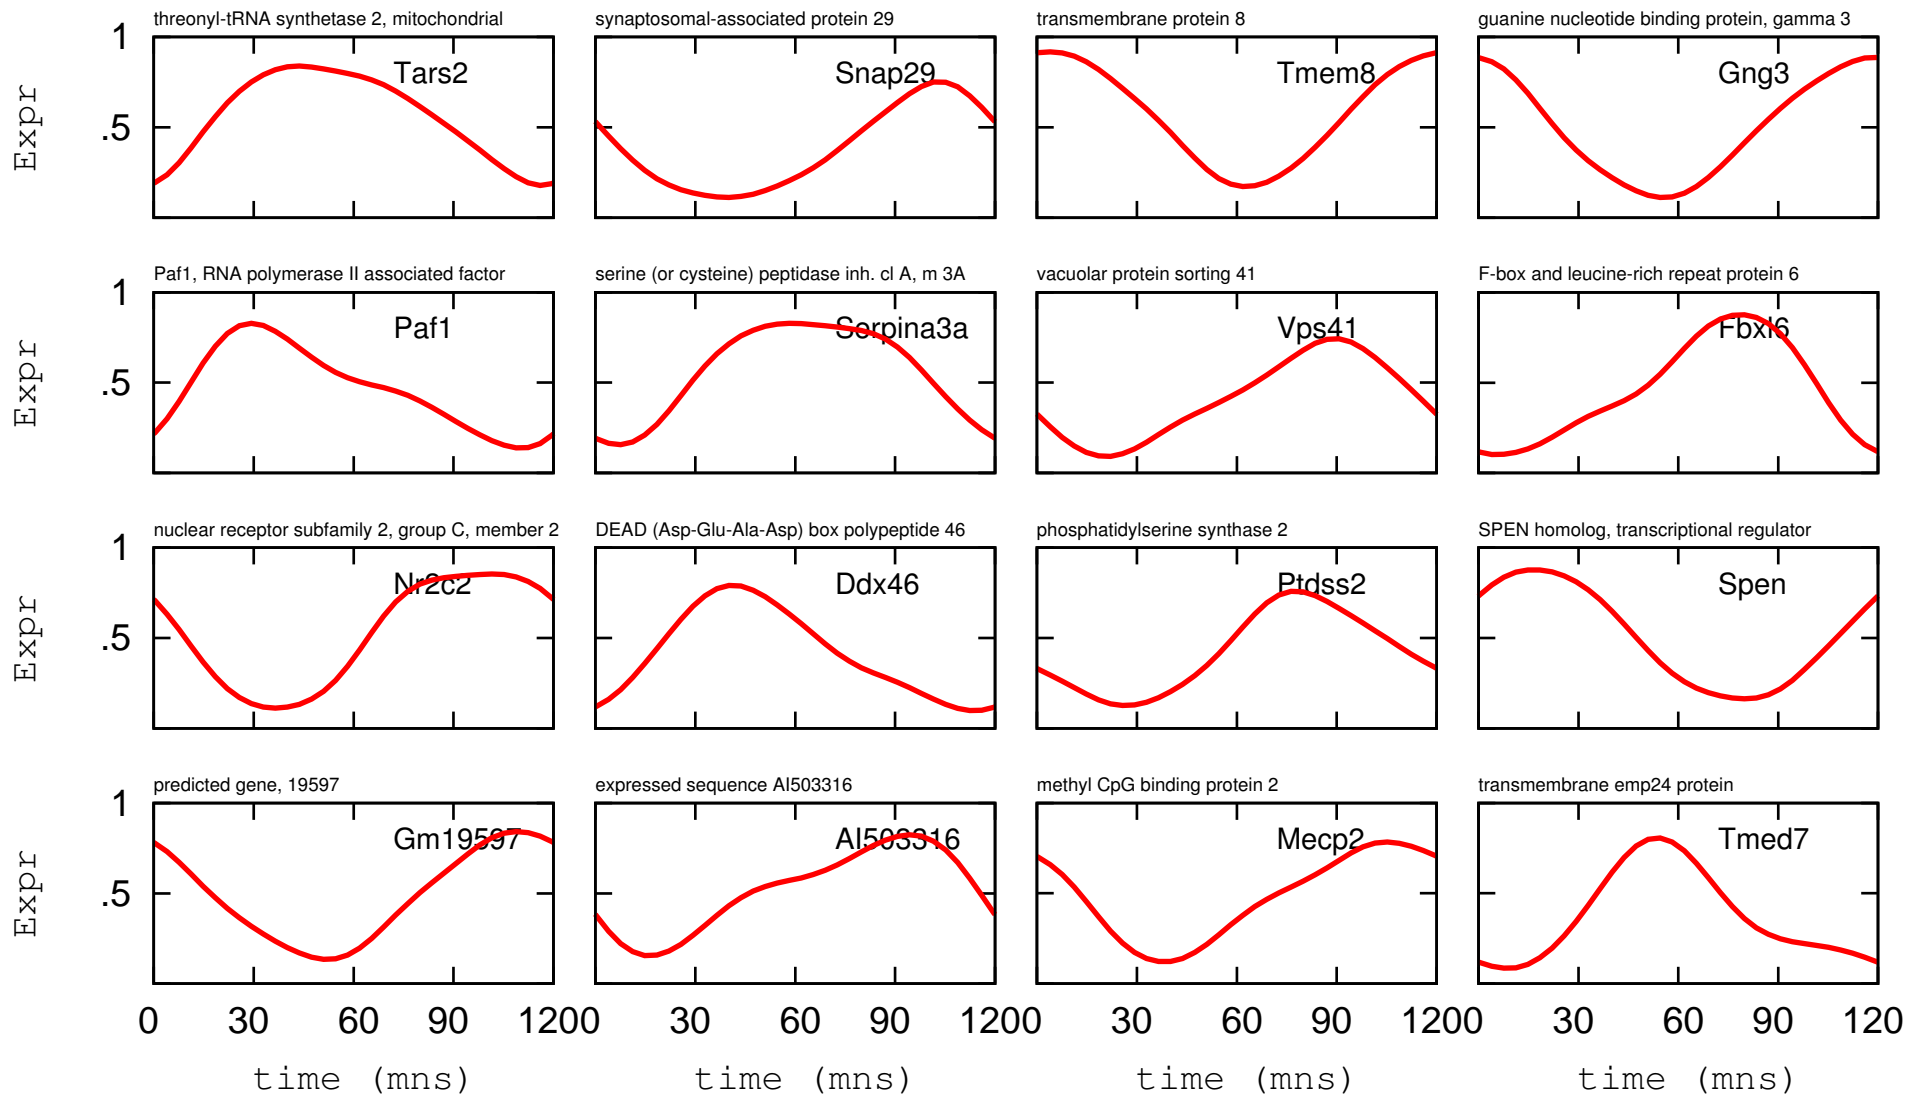

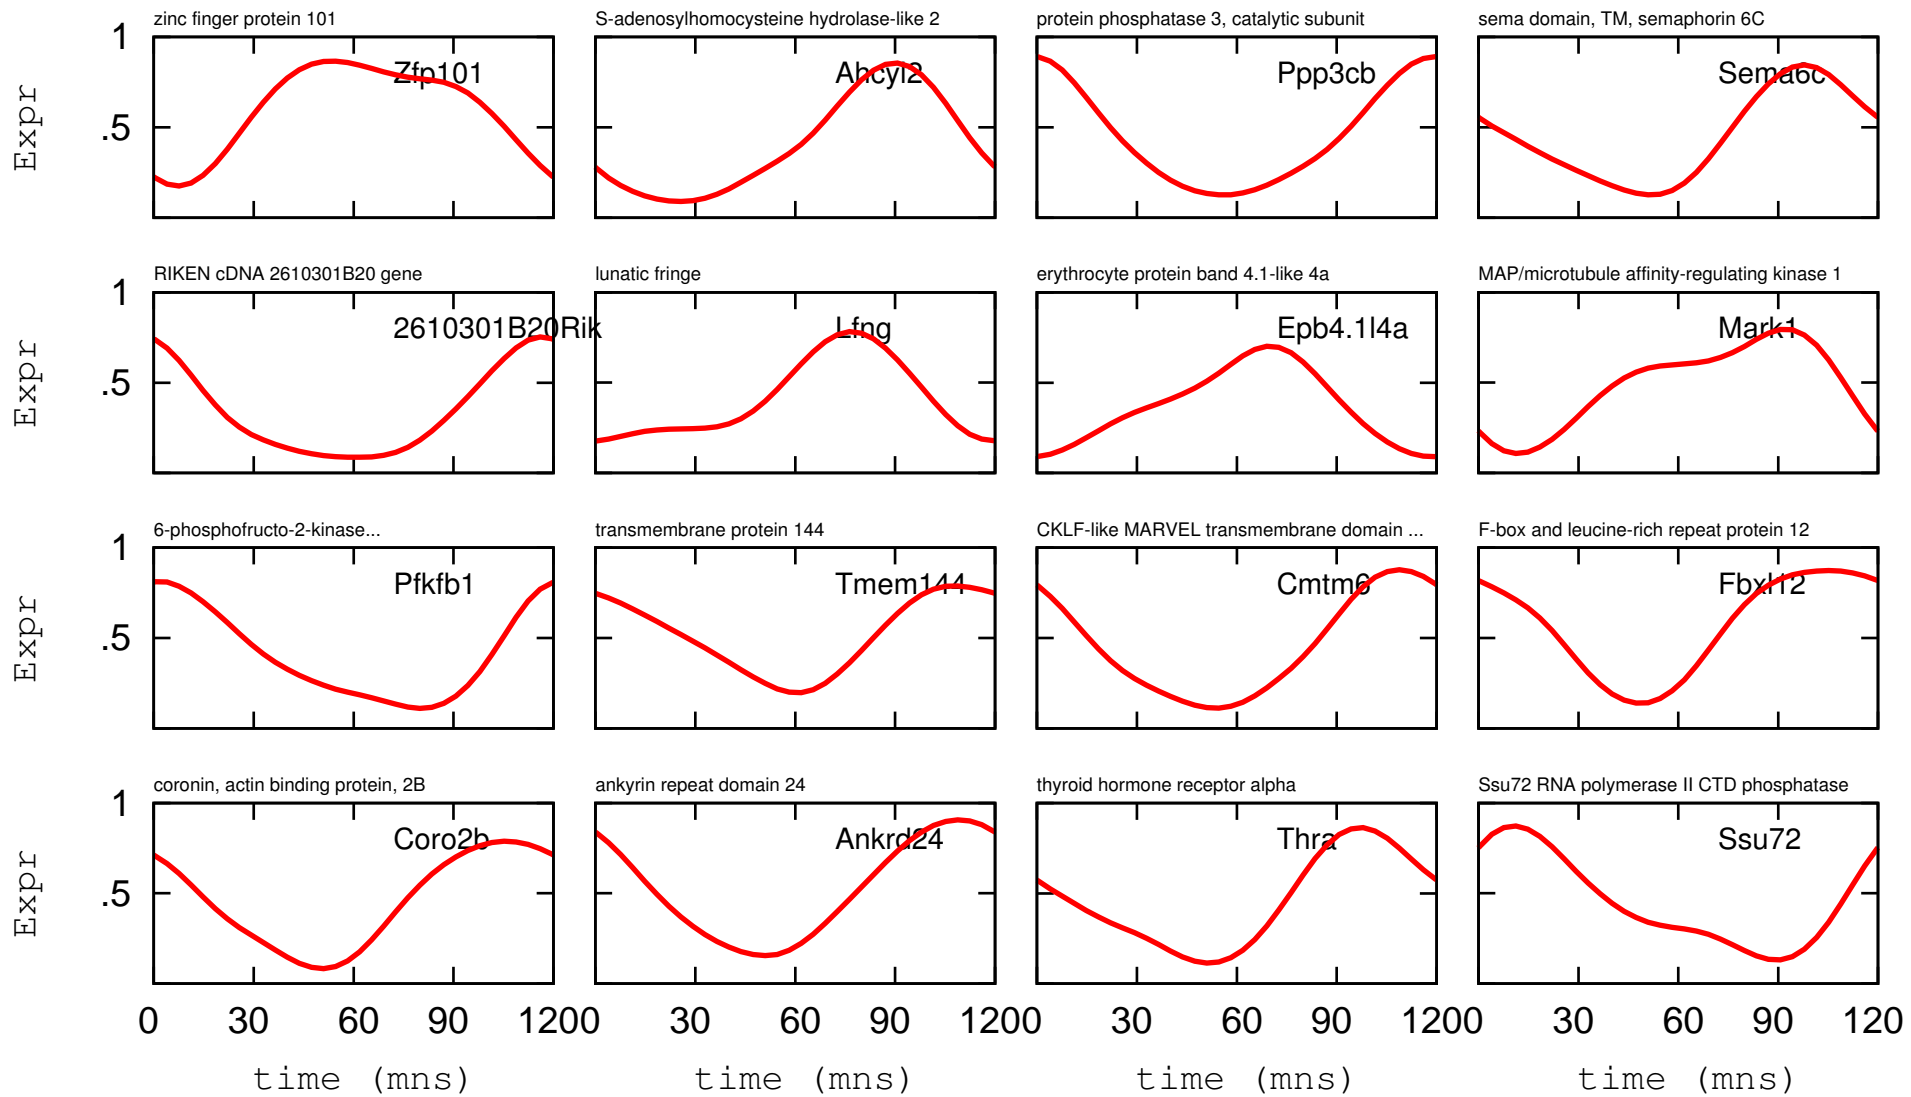

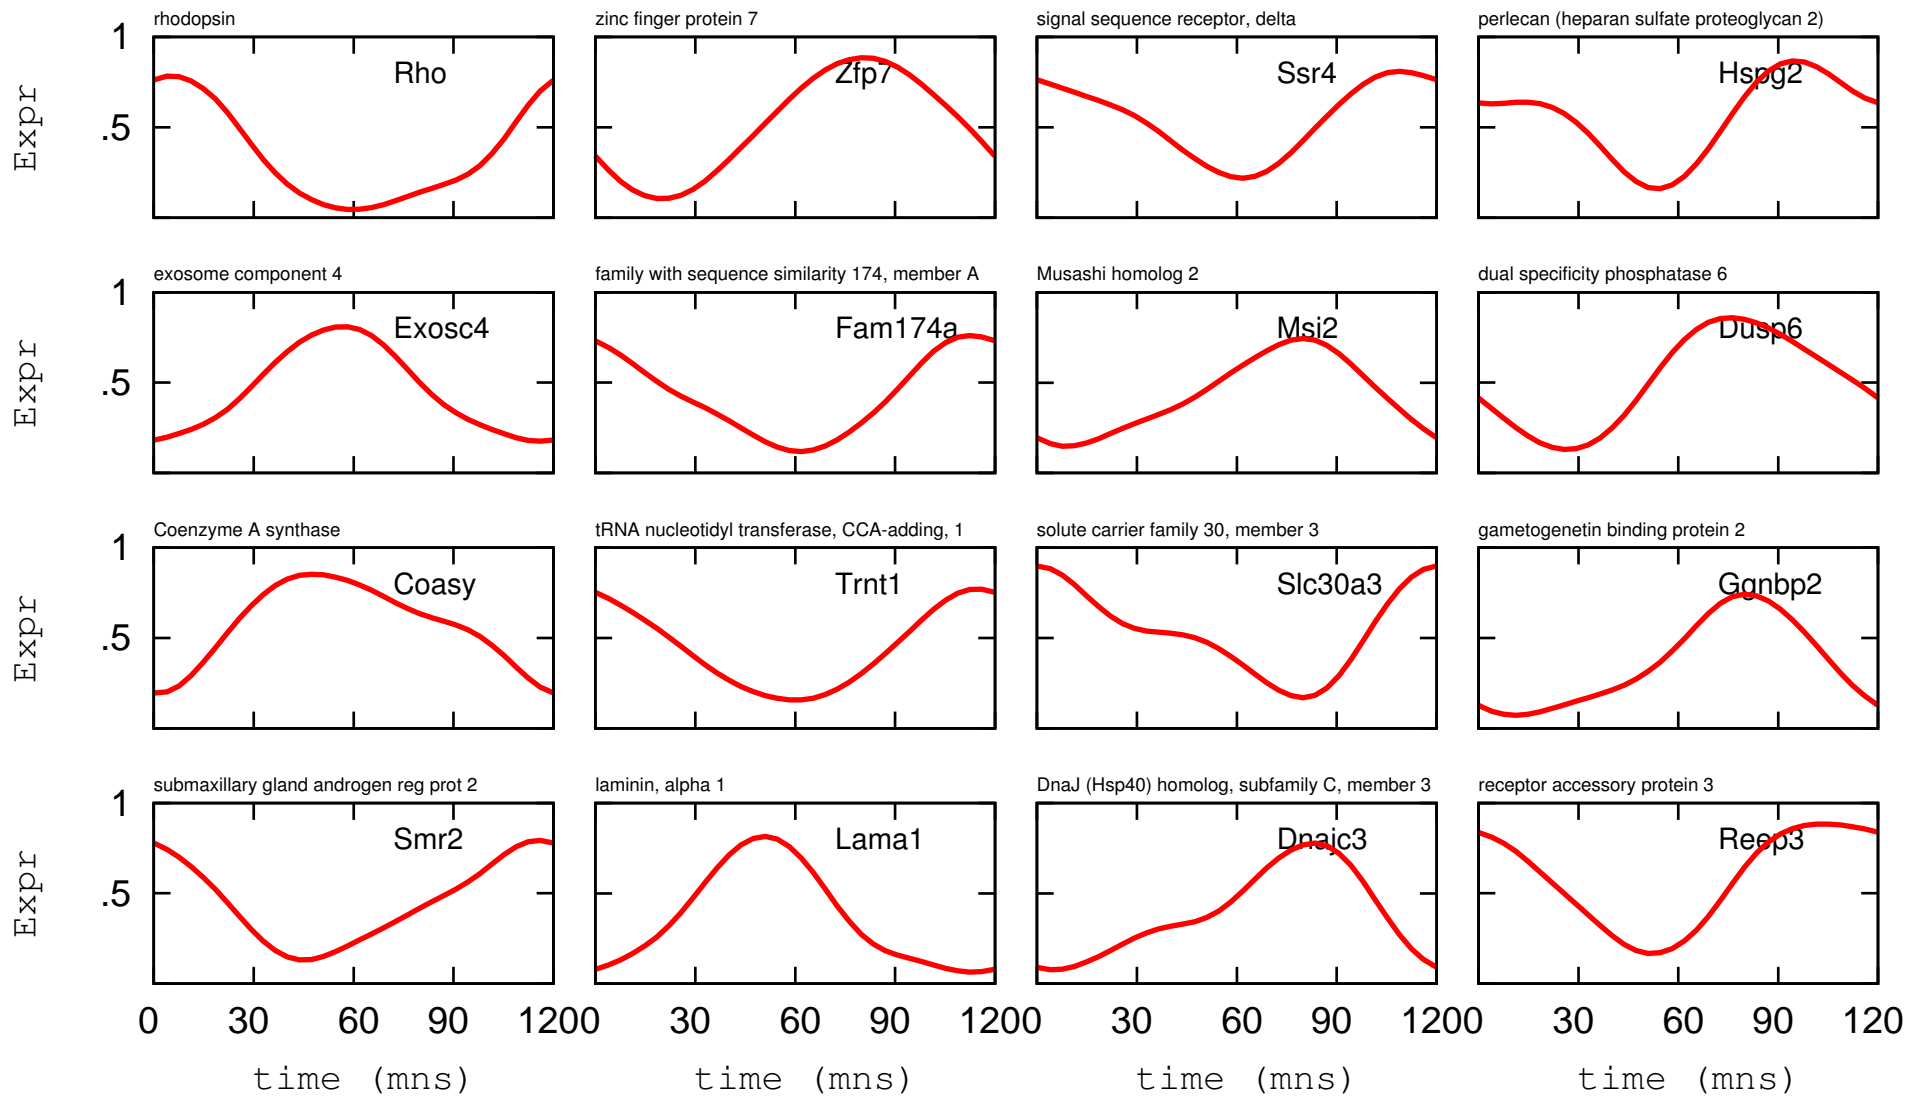

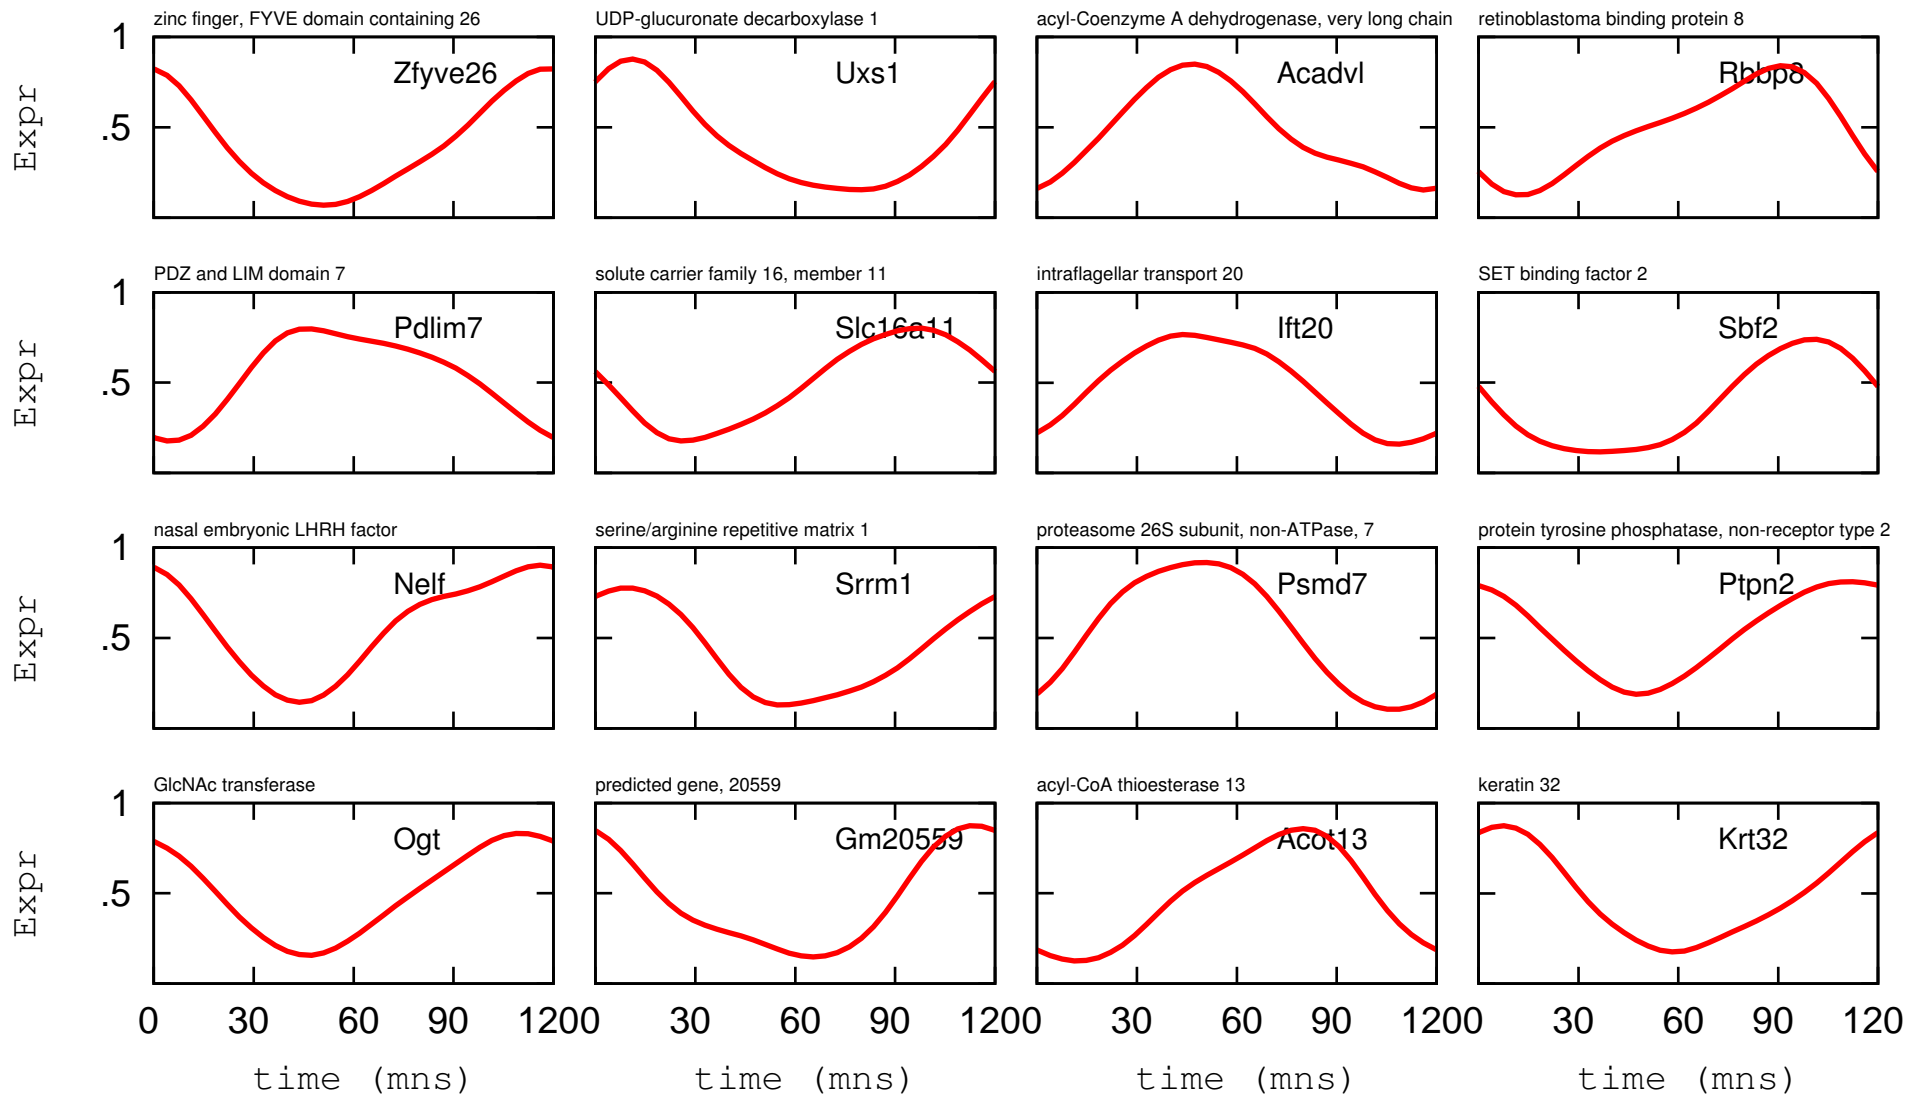



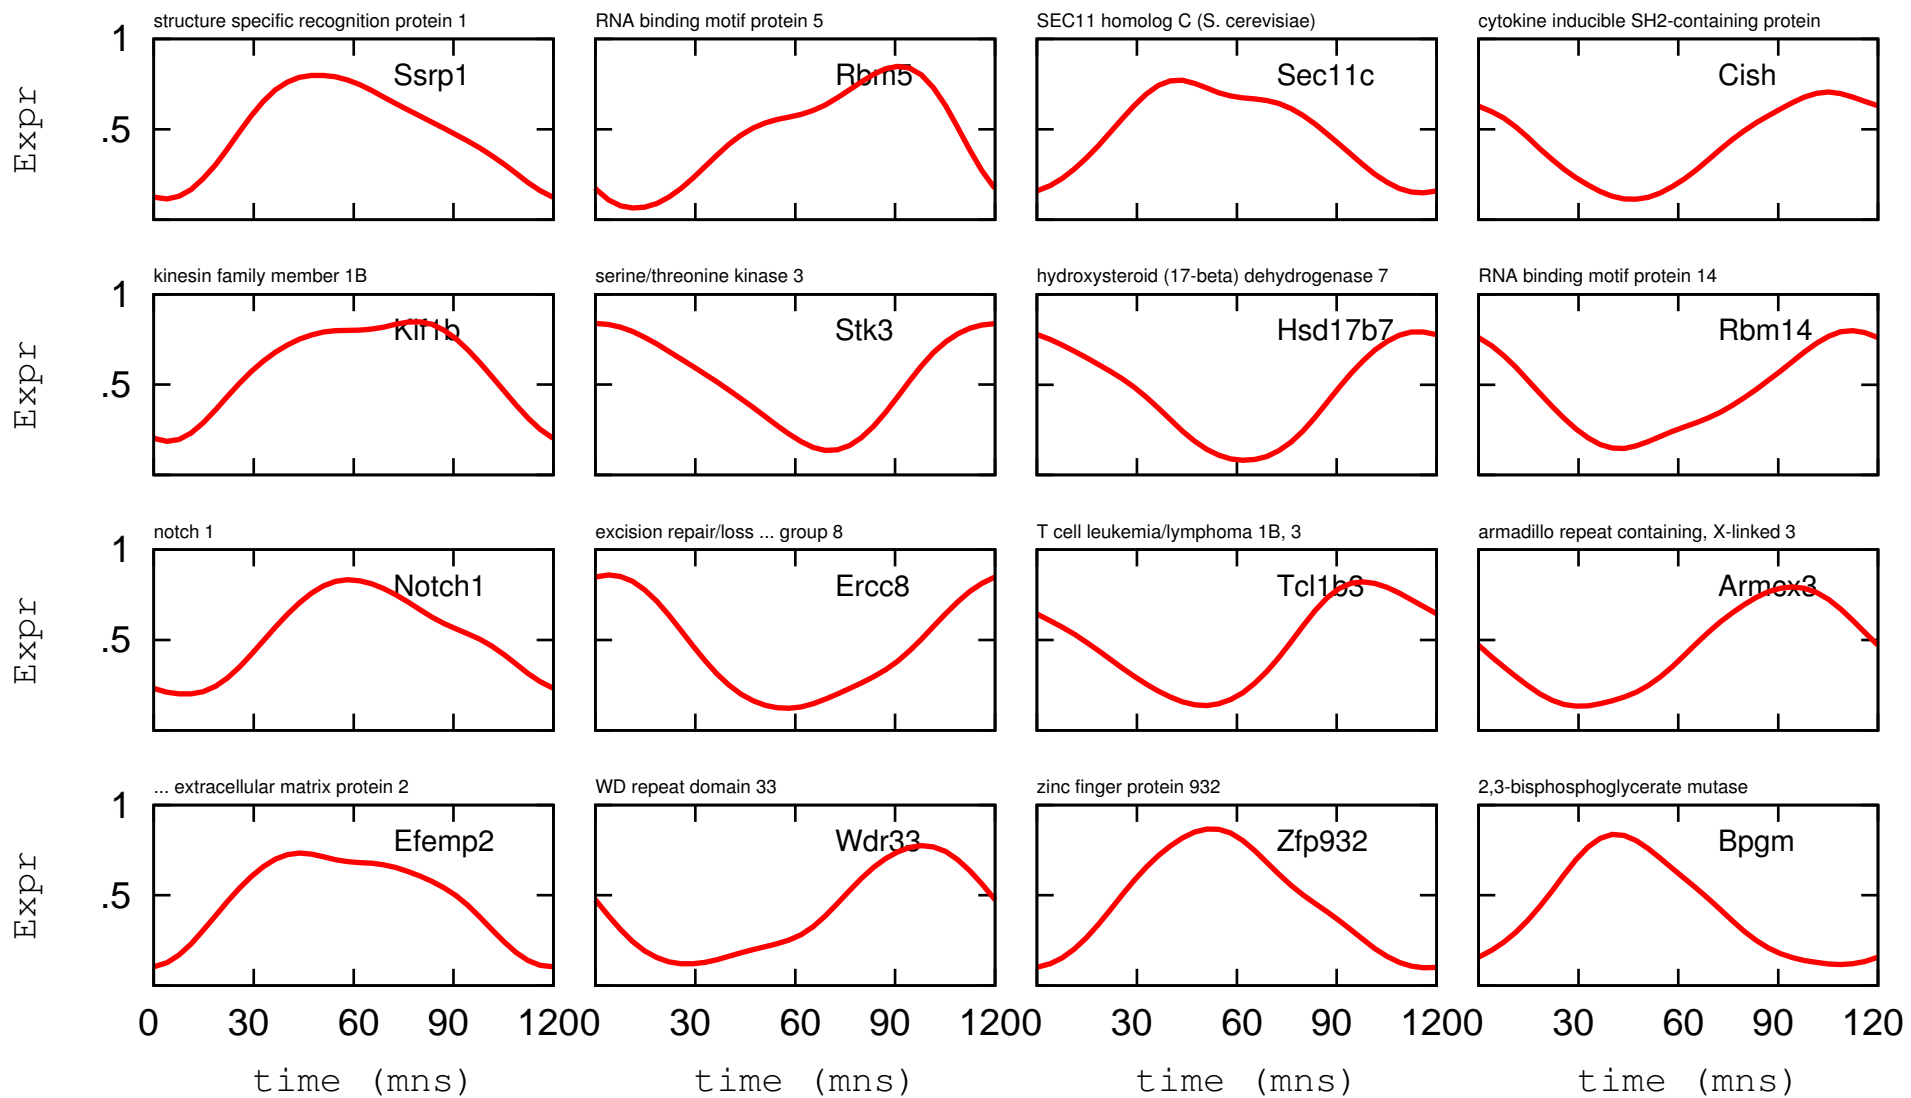

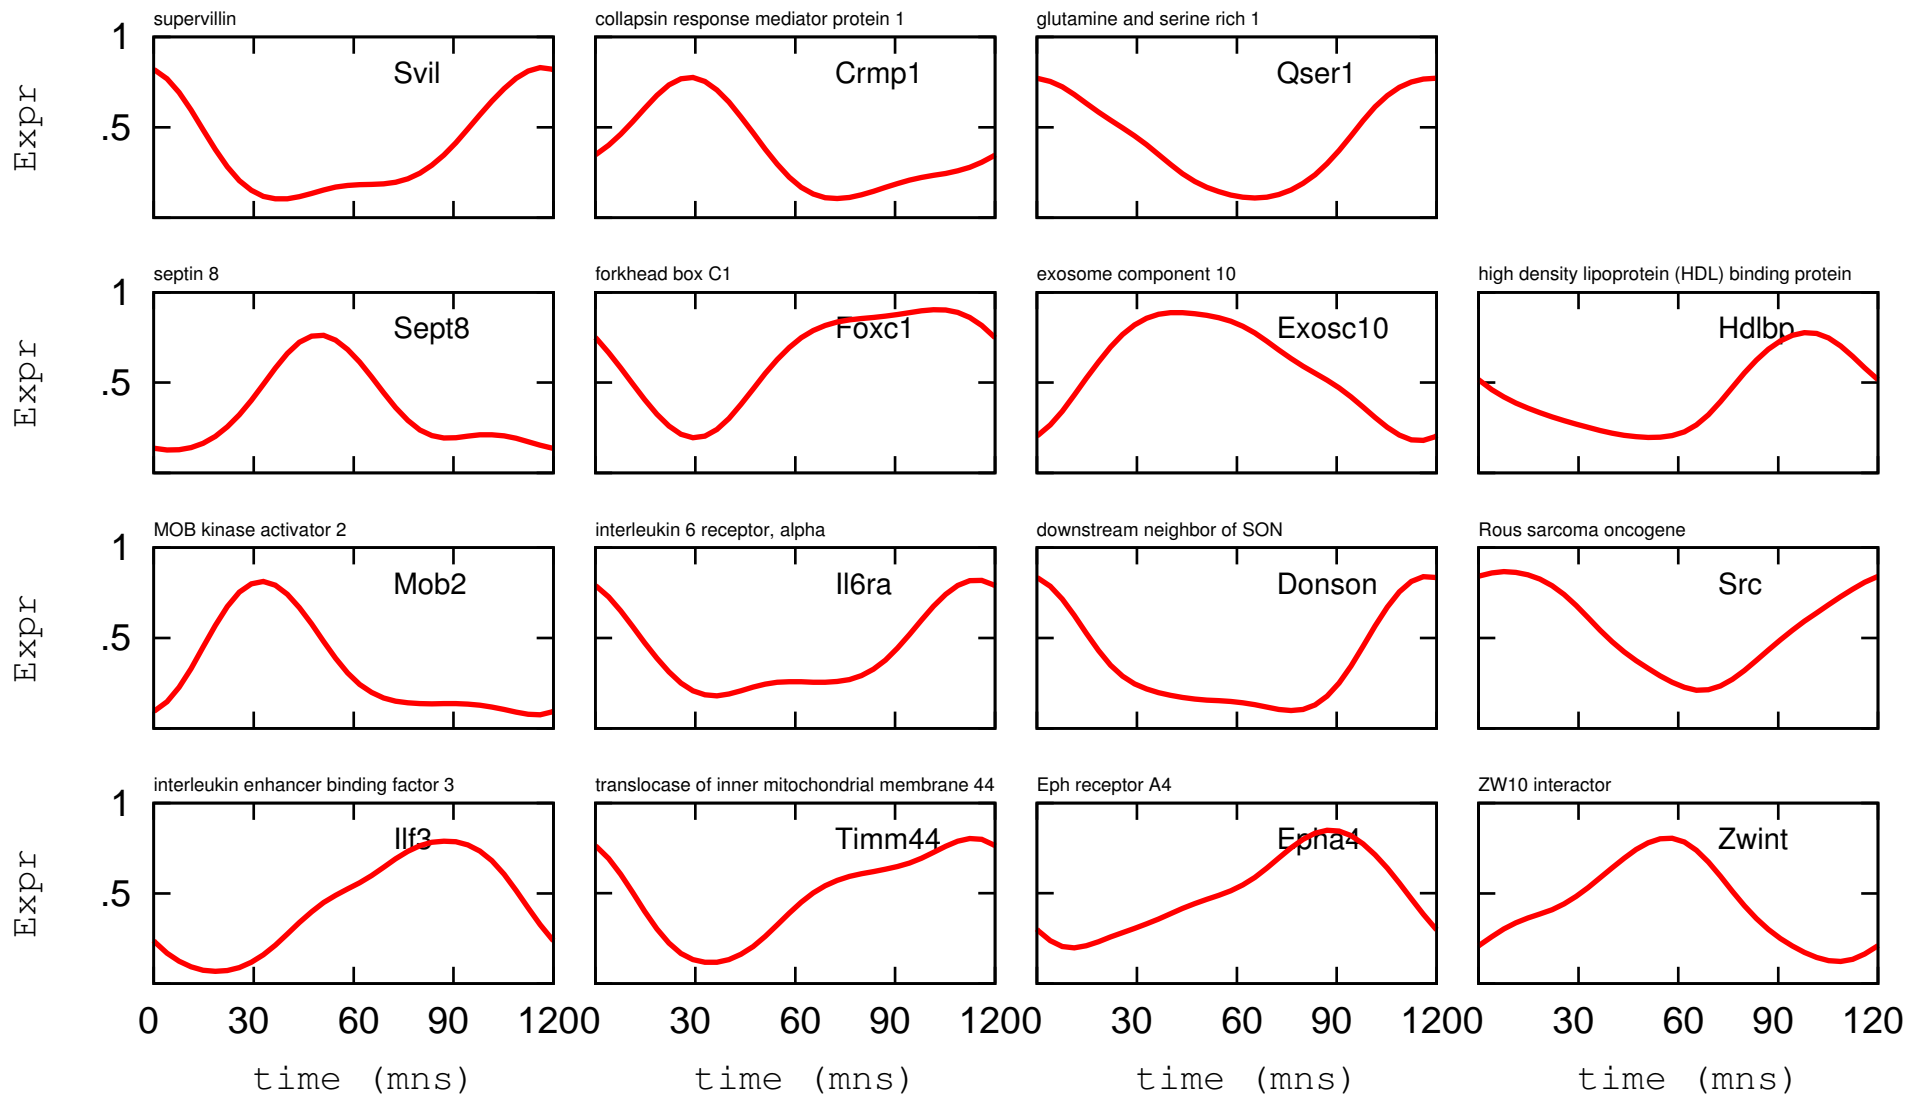

Supplement: 1471-213X-13-42-S12.pdf [file 1471-213X-13-42-S12.pdf]
